# Supplementary material for: Entropy drives the insertion of ibuprofen into model membranes
Source: Royal Society of Chemistry journal article supplement (doi:10.1039/c8cp04674c), 2018-01-01
Supplement: c8cp04674c1.pdf [file c8cp04674c1.pdf]

# Supporting Material to

## Entropy drives the insertion of Ibuprofen

### into model membranes

Natalia Rojas-Valencia,<sup>†</sup> Isaias Lans,<sup>‡,¶</sup> Marcela Manrique-Moreno,<sup>†</sup> C. Z.

Hadad,<sup>\*,†</sup> and Albeiro Restrepo<sup>\*,†</sup>

*Instituto de Química, Universidad de Antioquia UdeA, Calle 70 No. 52–21, Medellín, Colombia,*

*Grupo de Bioquímica Teórica, Universidad Industrial de Santander, Cra 26, Calle 9,*

*Bucaramanga, Colombia., and Max Planck Tandem Group, Universidad de Antioquia UdeA,*

*Calle 70 No. 52–21, Medellín, Colombia*

E-mail: [cacier.hadad@udea.edu.co](mailto:cacier.hadad@udea.edu.co); [albeiro.restrepo@udea.edu.co](mailto:albeiro.restrepo@udea.edu.co)

---

\*To whom correspondence should be addressed

<sup>†</sup>Instituto de Química, UdeA, Medellín, Colombia

<sup>‡</sup>Universidad Industrial de Santander, UIS, Bucaramanga, Colombia

<sup>¶</sup>Max Planck tandem group, UdeA, Medellín, Colombia

# Validation of the binary membrane/water system

## Area per lipid

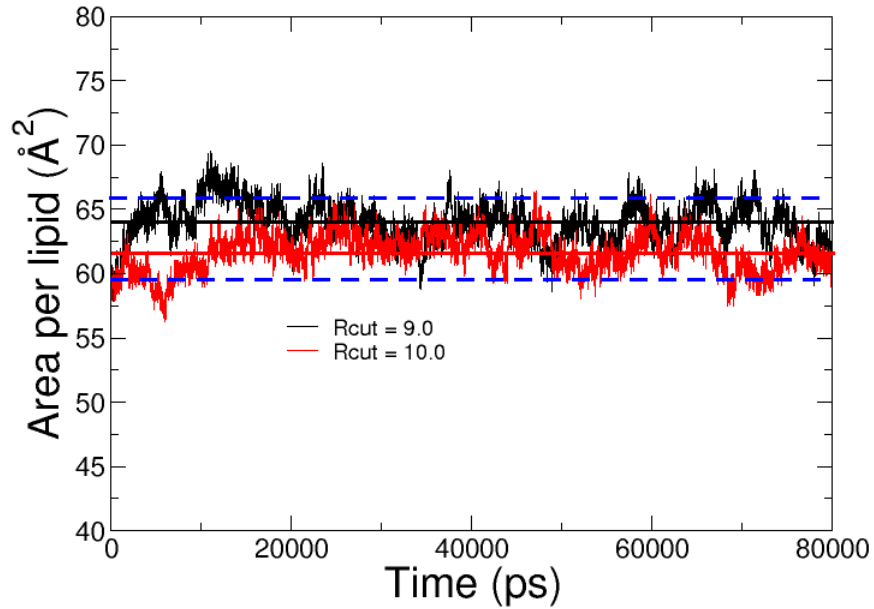

Figure 1: Red and black lines represent the averages obtained with 9.0 and 10.0 Å respectively. Blue lines show the experimental values.<sup>1-3</sup>

## Order parameters

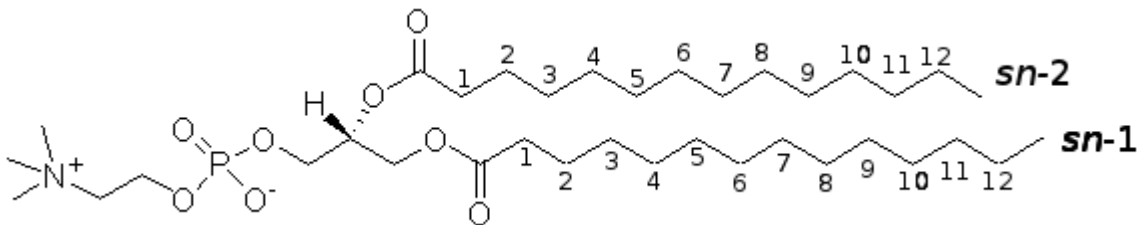

Figure 2: A DMPC molecule is shown. Only labeled atoms are considered for the calculation of order parameters in the lipid bilayer (see [Figure 3](#)).

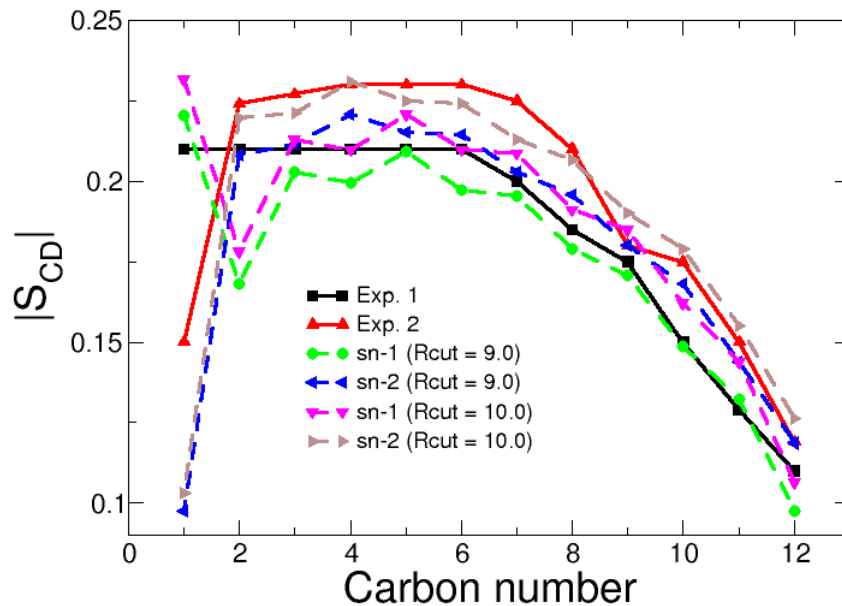

Figure 3: Order parameters for the hydrocarbon chains. Experimental<sup>4,5</sup> as well as calculated (cutoff radii in Å) values are shown.

### Thickness of the lipid bilayer

From the distance of the two peaks in the density of phosphorous atoms distribution on each layer shown in Figure 4, 35.8 and 35.63 Å were obtained for 9.0 and 10.0 Å cutoff radii respectively as thickness of the lipid bilayer. The experimental values fall in the 33.2–36.7 range.<sup>3,6–8</sup>

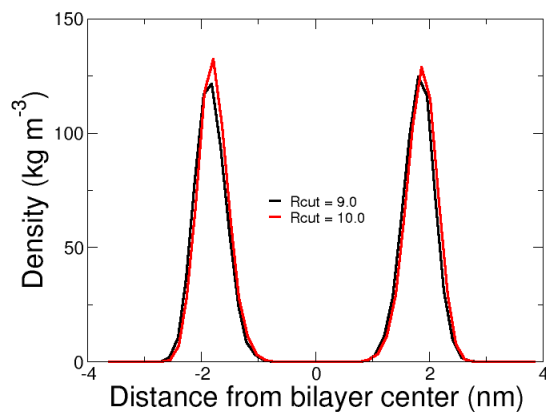

Figure 4: Distribution of phosphorous atoms in the lipid bilayer.

## Snapshots of the lipid environment with and without Ibuprofen

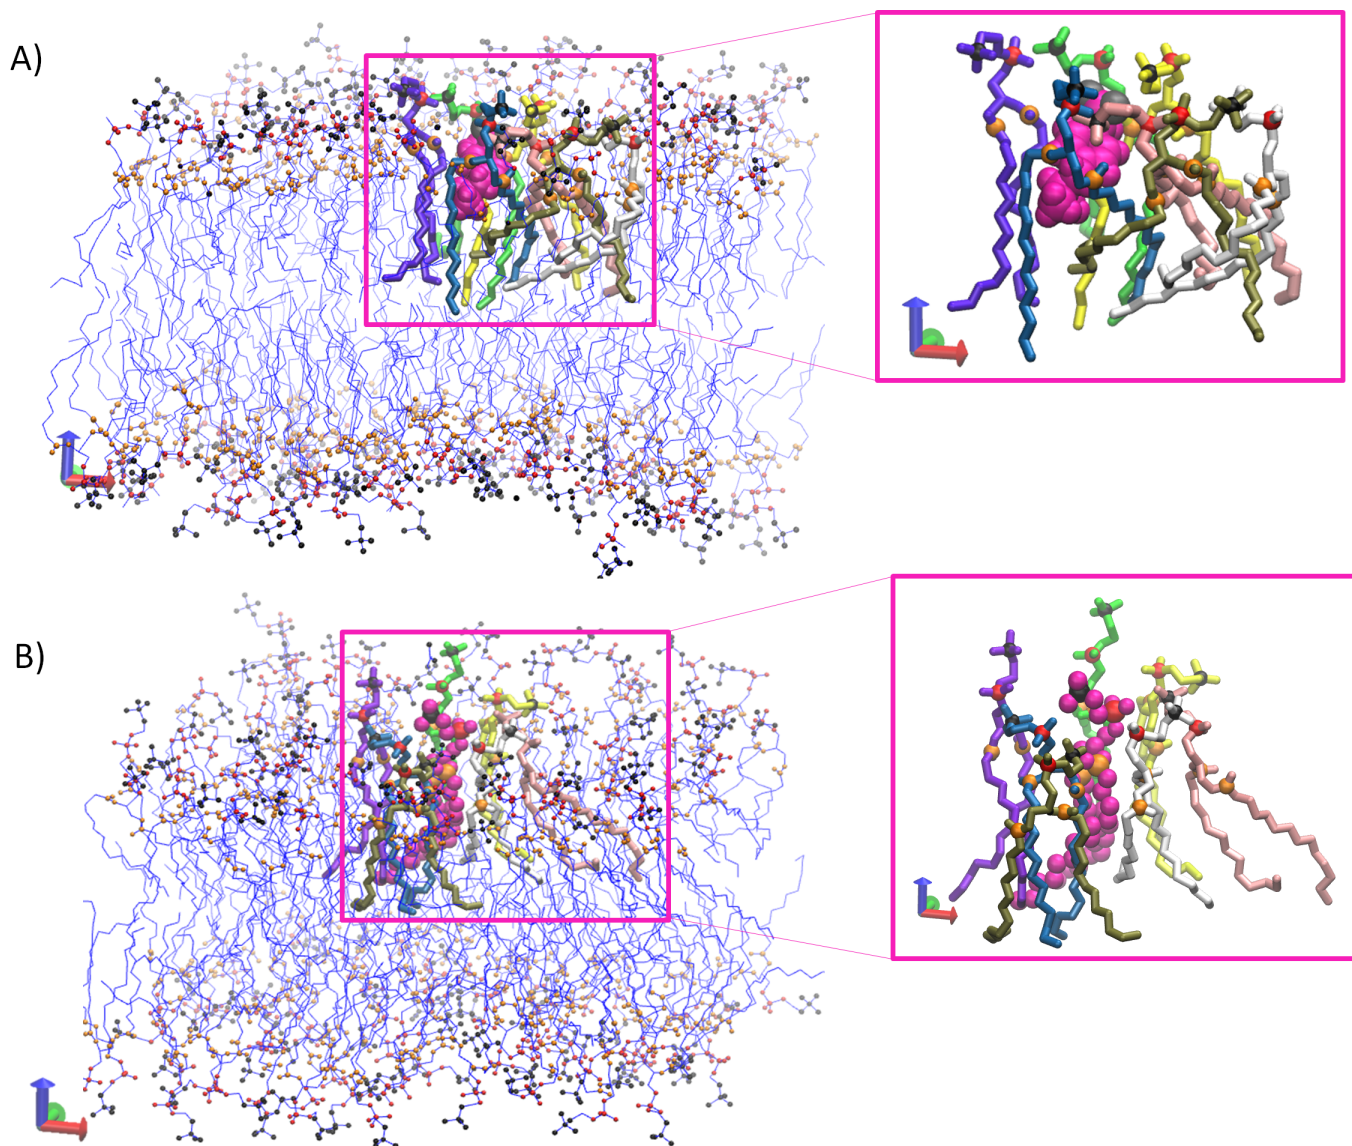

Figure 5: Structural organization of the lipid environment in the presence and absence of Ibuprofen. (A): Ibuprofen is located in the region of the minimum of Gibbs free energy. (B): Ibuprofen is located at the aqueous phase, at  $\approx 0.6$  nm above the membrane.

## References

- (1) Koenig, B. W.; Strey, H. H.; Gawrisch, K. Membrane lateral compressibility determined by NMR and X-Ray diffraction: effect of acyl chain polyunsaturation. *Biophys. J.* **1997**, *73*, 1954-1966.
- (2) Nagle, J. F.; Zhang, R.; Tristram-Nagle, S.; Sun, W.; Petrache, H. I.; Suter, R. M. X-Ray structure determination of fully hydrated  $L_{\alpha}$  phase dipalmitoylphosphatidylcholine bilayers. *Biophys. J.* **1996**, *70*, 1419-1431.
- (3) Kučerka, N.; Nieh, M.; Katsaras, J. Fluid phase lipid areas and bilayer thicknesses of commonly used phosphatidylcholines as a function of temperature. *Biochem. Biophys. Acta.* **2011**, *1808*, 2761-2771.
- (4) Petrache, H. I.; Dodd, S. W.; Brown, M. F. Area per lipid and acyl length distributions in fluid phosphatidylcholines determined by  $^2\text{H}$  NMR Spectroscopy. *Biophys. J.* **2000**, *79*, 3172-3192.
- (5) Douliez, J. P.; Léonard, A.; Dufourc, E.J. Restatement of order parameters in biomembranes: calculation of C-C bond order parameters from C-D quadrupolar splittings. *Biophys. J.* **1995**, *68*, 1727-1739.
- (6) Costigan, S. C.; Booth, P. J.; Templar, R. H. Estimations of lipid bilayer geometry in Å fluid lamellar phases. *Biochem. Biophys. Acta.* **2000**, *1468*, 41-54.
- (7) Petrache, H. I.; Tristram-Nagle, S.; Nagle, J. F. Fluid phase structure of EPC and DMPC bilayers. *Chem Phys Lipids.* **1998**, *95*, 83-94.
- (8) Kučerka, N.; Liu, Y.; Chu, N.; Petrache, H. I.; Tristram-Nagle, S.; Nagle, J. F. Structure of fully hydrated fluid phase DMPC and DLPC lipid bilayers using X-Ray scattering from oriented multilamellar arrays and from Unilamellar Vesicles. *Biophys. J.* **2005**, *88*, 2626-2637.
